# Supplementary material
Source: publisher site journal article supplement (https://www.dovepress.com/article/397304)
Supplement: Supplementary file 1 [file get_supplementary_file.php]

**Definitions1,2**

**RR-TB:** TB with resistance to rifampin.

**MDR-TB:** TB with resistance to at least isoniazid and rifampin.

**XDR-TB:** TB with resistance to at least isoniazid, rifampin, a fluoroquinolone (e.g. ofloxacin, levofloxacin) and one of three injectable second-line drugs (capreomycin, kanamycin, and amikacin).

**TB Treatment history: Initial treatment:** TB patients whose medical records indicated that the patient had denied having any prior anti-TB treatment or any history of more than 30 days of anti-TB treatment. **Retreatment:** TB patients who had been receiving TB treatment for at least 30 days or who had documented evidence of prior treatment in the case report or surveillance database.

**Cured:** Treatment completed as recommended by the national policy without evidence of failure AND three or more consecutive cultures taken at least 30 days apart are negative after the intensive phase.

**Completed treatment:** Treatment completed as recommended by the national policy without evidence of failure BUT no record that three or more consecutive cultures taken at least 30 days apart are negative after the intensive phase.

**Treatment failed:** Treatment terminated or need for permanent regimen change of at least

two anti-TB drugs because of:

− lack of conversion by the end of the intensive phase, *or*

− bacteriological reversion in the continuation phase after conversion to negative, *or*

− evidence of additional acquired resistance to fluoroquinolones or

second-line injectable drugs, *or*

− adverse drug reactions.

Died: A patient who dies for any reason during the course of treatment.

**Lost to follow-up:** A patient whose treatment was interrupted for 2 consecutive months or

more.

**Supplementary table 1.** Variables potentially associated with treatment outcomes.

|  | Variables | | | |
| --- | --- | --- | --- | --- |
| Demographic characteristics | Age | Gender | Educational Level | Treatment history |
| Smoking | Drinking | Residence | Diabetes mellitus |
| HIV infection |  |  |  |
| Radiological features | Bronchiectasis | Pulmonary cavity | Pleural effusion |  |
| DST results | Rifampicin | Isoniazid | Ethambutol | Kanamycin |
| Ofloxacin |  |  |  |
| Laboratory indicators | WBC | RBC | HGB | HCT |
| MCHC | NEUT% | LYMPH% | NEUT |
| LYMPH | RDW-CV | RDW-SD | PT |
| PT% | INR | APTT | Fbg |
| ESR | TP | ALB | GLOB |
| AGR | ALP | Glu | CK |
| Na+ | Cl- | Ca2+ | PA |
| SAA | CRP | PLT | MCV |
| MCH | MONO% | Eosinophil % | Basophil% |
| MONO | Eosinophil | Basophil | PDW |
| MPV | PCT | TT | TBIL |
| DBIL | IBIL | ALT | AST |
| γ.GGT | eGFR | Urea | Creatinine |
| UA | CK-MB | LDH | K+ |
| CHOL | AFU | NLR | CPR |

**Abbreviations:** WBC, white blood cell; RBC, red blood cell; HGB, hemoglobin; HCT, hematocrit; MCHC, mean corpuscular hemoglobin concentration; NEUT, neutrophil count; LYMPH, lymphocyte count; RDW-CV, red blood cell volume; RDW-SD, standard deviation in red cell distribution width; PT, prothrombin time; INR, international normalized ratio; APTT, activated partial thromboplastin time; Fbg, fibrinogen; ESR, erythrocyte sedimentation rate; TP, total protein; ALB, albumin; GLOB, globulin; AGR, albumin-to-globulin ratio; ALP, Alkaline phosphatase; Glu, glucose; CK, creatine kinase; Na+, natrium; CL- , chlorine; Ca2+, calcium; PA, prealbumin; SAA, serum amyloid A; CRP, C-reactive protein; PLT, platelet; MCV, mean red blood cell volume; MCH, mean corpuscular hemoglobin; MONO, monocyte count; PDW, platelet distribution width; MPV, mean platelet volume; PCT, platelet hematocrit; TT, Thrombin time; TBIL, total bilirubin; DBIL, direct bilirubin; IBIL, Indirect bilirubin; ALT, alanine transaminase; AST, aspartate aminotransferase; γ-GGT, gama-glutamyl transpeptidase; eGFR, estimated glomerular filtration rate; UA, uric acid; CK-MB, CK isoenzyme MB; LDH, lactate dehydrogenase; K+, kalium; CHOL, serum total cholesterol; AFU, α-L-fucosidase; NLR, neutrophils to lymphocyte ratio; CPR, CRP-to- prealbumin ratio.

**Supplementary table 2. The distribution of the UTO and laboratory indicators between the training and validation sets.**

| Variables | Training set | Validation set | P-value |
| --- | --- | --- | --- |
| UTO |  |  |  |
| Yes | 59 | 33 |  |
| no | 169 | 72 | 0.293 |
| RDW-CV |  |  |  |
| ≥13.9 | 64 | 30 |  |
| ＜13.9 | 164 | 75 | 0.925 |
| INR |  |  |  |
| ≥1.05 | 60 | 26 |  |
| ＜1.05 | 168 | 79 | 0.763 |
| AGR |  |  |  |
| ≥1.12 | 135 | 60 |  |
| ＜1.12 | 93 | 45 | 0.722 |
| CPR |  |  |  |
| ≥0.1502 | 107 | 52 |  |
| ＜0.1502 | 121 | 53 | 0.660 |

**Abbreviations:** UTO, unfavorable treatment outcome; RDW-CV, red blood cell volume; INR, international normalized ratio; AGR, albumin-to-globulin ratio; CPR, CRP-to- prealbumin ratio.

**Supplementary table 3**. AUC of variables selected by LASSO regression.

| **Variables** | **AUC** | **Standard error** | **P-values** | **95%CI** | |
| --- | --- | --- | --- | --- | --- |
| **Upper** | **Lower** |
| **Laboratory Parameters** |  |  |  |  |  |
| RDW-CV | 0.61 | 0.036 | 0.002 | 0.541 | 0.68 |
| INR | 0.63 | 0.035 | <0.001 | 0.56 | 0.699 |
| APTT | 0.646 | 0.034 | <0.001 | 0.578 | 0.713 |
| ESR | 0.669 | 0.033 | <0.001 | 0.605 | 0.733 |
| CRP | 0.71 | 0.031 | <0.001 | 0.649 | 0.771 |
| CK | 0.683 | 0.034 | <0.001 | 0.616 | 0.749 |
| PA | 0.718 | 0.033 | <0.001 | 0.653 | 0.783 |
| NLR | 0.68 | 0.034 | <0.001 | 0.614 | 0.746 |
| CPR | 0.73 | 0.031 | <0.001 | 0.669 | 0.79 |
| AGR | 0.702 | 0.033 | <0.001 | 0.637 | 0.767 |
| **Clinical features** |  |  |  |  |  |
| Drinking* | 0.589 | 0.037 | 0.012 | 0.518 | 0.661 |
| Education level | 0.639 | 0.036 | <0.001 | 0.568 | 0.709 |
| Bronchiectasis | 0.618 | 0.035 | 0.001 | 0.55 | 0.687 |
| Age | 0.737 | 0.028 | <0.001 | 0.681 | 0.792 |

**Abbreviations:** RDW-CV, red blood cell distribution width-coefficient of variation; INR, international normalized ratio, APTT, activated partial thromboplastin time, ESR, erythrocyte sedimentation rate; CRP, C-reactive protein CK, creatine kinase; PA, prealbumin; NLR, neutrophils-to-lymphocyte ratio; CPR, CRP-to- prealbumin ratio AGR, albumin-to-globulin ratio. * Excluded for AUC≤0.6.

**Supplementary Table 4**. ROC analysis of the scoring system for identifying UFO in the training set.

| **Cutoff score** | **Youden index** | **Sensitivity** | **Specificity** |
| --- | --- | --- | --- |
| ≥17 | 0.516 | 0.847 | 0.669 |
| ≥18 | 0.581 | 0.847 | 0.734 |
| ≥19 | 0.665 | 0.831 | 0.834 |
| ≥20 | 0.648 | 0.814 | 0.834 |
| ≥21 | 0.643 | 0.797 | 0.846 |

**Abbreviations:** CI, confidence interval; PLR, positive likelihood ratio; NLR, negative likelihood ratio.

**Reference**

1. World Health O. *WHO consolidated guidelines on drug-resistant tuberculosis treatment*. World Health Organization; 2019.

2. World Health O. *Definitions and reporting framework for tuberculosis – 2013 revision: updated December 2014 and January 2020*. World Health Organization; 2013.
